# Supplementary material
Source: publisher figshare collection journal article supplement (https://sage.figshare.com/ndownloader/files/31566801)
Supplement: Supplementary file 1 [file 31566801]

Supplemental Material

|  |  |  | AIS + LVO  (n=442) | AIS – LVO  (n=1596) | ICH  (n=350) | Mimic  (n=427) |
| --- | --- | --- | --- | --- | --- | --- |
|  | Age. y | mean (SD) | 73.7 (+/-13.3) | 70.4 (+/-14.3) | 68.9 (+/-14.0) | 71.6 (+/-16.1) |
|  | Sex. male | n (%) | 186 (42.1%) | 810 (50.8%) | 197 (56.3%) | 188 (44.0%) |
| History | |  |  |  |  |  |
|  | Hypertension | n (%) | 333 (75.3%) | 1189 (74.5%) | 258 (73.7%) | 238 (55.7%) |
|  | Diabetes | n (%) | 107 (24.2%) | 451 (28.3%) | 70 (20.0%) | 88 (20.6%) |
|  | Atrial Fibrillation | n (%) | 229 (51.8%) | 393 (24.6%) | 95 (27.1%) | 80 (18.7%) |
|  | Coronary Artery Disease | n (%) | 83 (18.8%) | 302 (18.9%) | 43 (12.3%) | 49 (11.5%) |
|  | Peripheral Artery Disease | n (%) | 37 (8.4%) | 90 (5.6%) | 22 (6.3%) | 17 (4.0%) |
|  | Prior Stroke | n (%) | 99 (22.4%) | 413 (25.9%) | 83 (23.7%) | 128 (30.0%) |
|  | Prior TIA | n (%) | 12 (2.7%) | 111 (7.0%) | 10 (2.9%) | 16 (3.7%) |
| LVO Recognition Scores | |  |  |  |  |  |
|  | FAST-ED App | MD (IQR) | 5.0 (4.0-7.0) | 1.0 (0.0-2.0) | 4.0 (1.0-7.0) | 0.0 (0.0-1.0) |
|  | FAST-ED | MD (IQR) | 5.0 (4.0-7.0) | 1.0 (0.0-2.0) | 4.0 (2.0-7.0) | 0.0 (0.0-1.0) |
|  | RACE | MD (IQR) | 7.0 (5.0-9.0) | 1.0 (0.0-3.0) | 6.0 (2.0-8.0) | 0.0 (0.0-2.0) |
|  | CPSS | MD (IQR) | 3.0 (2.0-4.0) | 0.0 (0.0-1.0) | 2.0 (1.0-4.0) | 0.0 (0.0-1.0) |
|  | 3-ISS | MD (IQR) | 3.0 (2.0-4.0) | 0.0 (0.0-2.0) | 3.0 (1.0-5.0) | 0.0 (0.0-1.0) |
|  | NIHSS | MD (IQR) | 16.0 (10.0-23.0) | 3.0 (1.0-6.0) | 14.0 (5.0-33.0) | 2.0 (0.0-4.0) |
| Therapy | |  |  |  |  |  |
|  | Thrombolysis | n (%) | 240 (54.3%) | 372 (23.3%) | n/a | n/a |
|  | Thrombectomy | n (%) | 300 (67.9%) | 17 (1.1%) | n/a | n/a |

**Supplemental Table S1.** Baseline Information for patients with acute ischemic stroke with large vessel occlusion (AIS + LVO), without LVO (AIS - LVO), intracranial haemorrhage (ICH), and stroke mimics (Mimic). App-Version of the Field Assessment Stroke Triage for Emergency Destination (FAST-ED App), Field Assessment Stroke Triage for Emergency Destination (FAST-ED), Rapid Arterial Occlusion Evaluation (RACE), Cincinnati Prehospital Stroke Severity (CPSS), 3-Item Stroke Scale (3-ISS), and National Institute of Health Stroke Scale (NIHSS)
